# Supplementary material for: 3D solvent-free energetic metal–organic framework (EMOF) achieved by removing inclusion molecules from a new coordination polymer
Source: Royal Society of Chemistry journal article supplement (doi:10.1039/c8ce01803k), 2018-12-12
Supplement: c8ce01803k1.pdf [file c8ce01803k1.pdf]

## Supporting Information

### A 3D solvent-free energetic metal-organic framework (EMOF) achieved by removing inclusion molecules from a new coordination polymer

Sheng Zhang,<sup>‡a,b</sup> Shuo Wu,<sup>‡a</sup> Wendou Zhang,<sup>a</sup> Qi Yang,<sup>\*a</sup> Qing Wei,<sup>a</sup> Gang Xie,<sup>a</sup> Sanping Chen,<sup>\*a</sup> Shengli Gao,<sup>a</sup> Jack Y. Lu<sup>\*a,c</sup>

<sup>a</sup> Key Laboratory of Synthetic and Natural Functional Molecule Chemistry of Ministry of Education, College of Chemistry and Materials Science, Northwest University, Xi'an, Shaanxi 710069, China.

<sup>b</sup> College of Chemistry and Chemical Engineering, Baoji University of Arts and Sciences, Baoji 721013, China.

<sup>c</sup> Department of Chemistry, University of Houston-Clear Lake, 2700 Bay Area Blvd. Houston, TX 77058, U.S.A

<sup>‡</sup> These authors contributed equally to this work.

**Table S1** Elemental analyses of **1** by ICP-AES method.

|                        | Expt.<br>( $\omega/\%$ ) | RSD<br>(%) | Calc.<br>( $\omega/\%$ ) |
|------------------------|--------------------------|------------|--------------------------|
| Cu                     | 29.867                   | 1.11       | 29.86                    |
| Na                     | 3.572                    | 0.95       | 3.58                     |
| molar ratio<br>(Cu/Na) | 3:1                      |            | 2.997:1                  |

Table S2. Selected bond lengths (Å) and bond angles (°) for **1**.

|                     |            |                     |            |
|---------------------|------------|---------------------|------------|
| Cu(1)-N(2)          | 1.998(9)   | Cu(1)-N(2)#3        | 1.998(9)   |
| Cu(1)-N(2)#1        | 1.998(9)   | Cu(2)-N(3)#4        | 1.874(7)   |
| Cu(1)-N(2)#2        | 1.998(9)   | Cu(2)-N(3)          | 1.874(7)   |
| Na(1)-O(1)          | 2.266(7)   | Na(1)-O(1)#7        | 2.266(7)   |
| Na(1)-O(1)#5        | 2.266(7)   | Na(1)-O(1)#6        | 2.266(7)   |
| N(2)-Cu(1)-N(2)#1   | 104.4(2)   | N(3)-N(2)-Cu(1)     | 126.1(6)   |
| N(2)#1-Cu(1)-N(2)#2 | 120.2(5)   | C(2)-N(2)-Cu(1)     | 126.4(8)   |
| N(2)-Cu(1)-N(2)#2   | 104.4(2)   | N(2)-N(3)-Cu(2)     | 125.1(6)   |
| N(2)#1-Cu(1)-N(2)#3 | 104.4(2)   | C(1)-N(3)-Cu(2)     | 126.3(7)   |
| N(2)#2-Cu(1)-N(2)#3 | 104.4(2)   | N(3)#4-Cu(2)-N(3)   | 180.0      |
| N(2)-Cu(1)-N(2)#3   | 120.2(5)   | O(1)-Na(1)-O(1)#6   | 94.2(3)    |
| O(1)#5-Na(1)-O(1)#6 | 117.58(19) | O(1)-Na(1)-O(1)#7   | 117.58(19) |
| O(1)-Na(1)-O(1)#5   | 117.58(19) | O(1)#7-Na(1)-O(1)#6 | 117.58(19) |
| O(1)#5-Na(1)-O(1)#7 | 94.2(3)    | C(1)-O(1)-Na(1)     | 133.2(6)   |

Symmetry transformations used to generate equivalent atoms: #1  $5/4-Y, 1/4+X, 3/4-Z$ ; #2  $-1/4+Y, 5/4-X, 3/4-Z$ ; #3  $1-X, 3/2-Y, +Z$ ; #4  $1-X, 1-Y, 1-Z$ ; #5  $3/4-Y, -1/4+X, 1/4-Z$ ; #6  $1-X, 1/2-Y, +Z$ ; #7  $1/4+Y, 3/4-X, 1/4-Z$ .

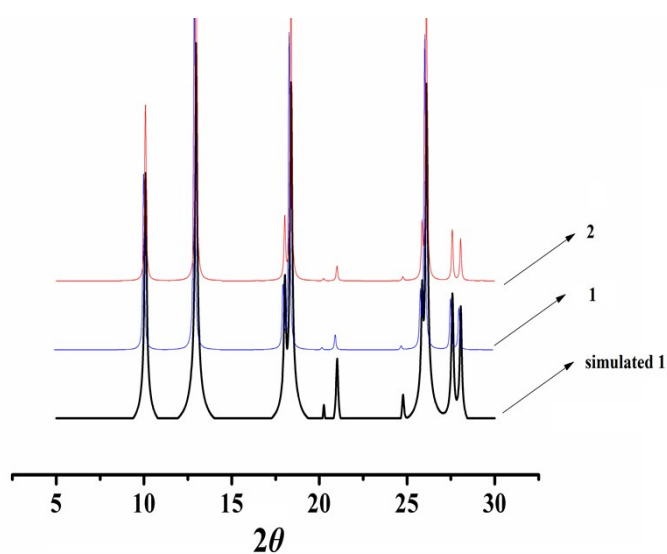Figure S1. X-ray powder diffraction patterns of **1** and **2**.

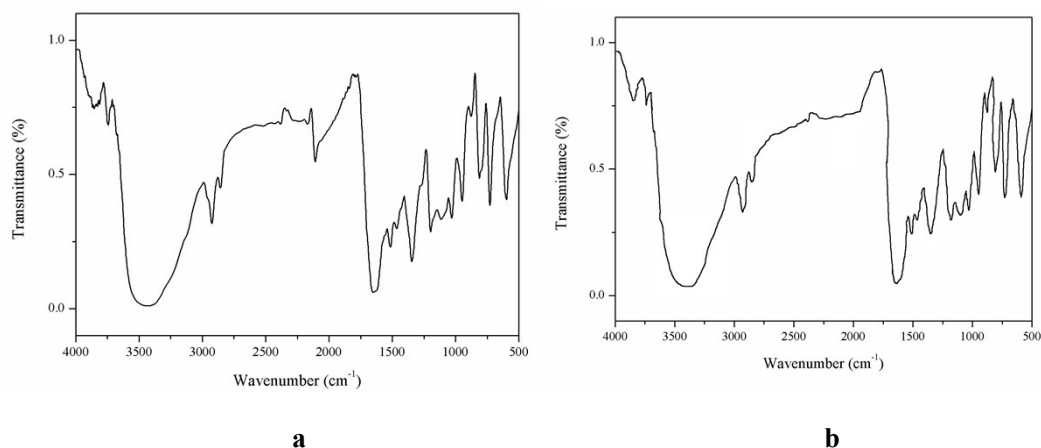

Figure S2. IR spectra of **1** (a) and **2** (b).

```
# SQUEEZE RESULTS (Version = 150216)
# Note: Data are Listed for all Voids in the P1 Unit Cell
# i.e. Centre of Gravity, Solvent Accessible Volume,
# Recovered number of Electrons in the Void and
# Details about the Squeezed Material
loop_
  _platon_squeeze_void_nr
  _platon_squeeze_void_average_x
  _platon_squeeze_void_average_y
  _platon_squeeze_void_average_z
  _platon_squeeze_void_volume
  _platon_squeeze_void_count_electrons
  _platon_squeeze_void_content
1 0.250 0.000 -0.015 153 86''
2 0.250 0.500 -0.017 153 86''
3 0.750 0.000 -0.015 153 86''
4 0.750 0.500 -0.015 153 86''
  _platon_squeeze_void_probe_radius 1.20
```

Figure S3. The SQUEEZE details of **1**. ( $Z = 4$ ; so the Formula unit is  $1/4$  of the unit cell, this then is consistent with  $1/4$  of the SQUEEZED-OUT electrons ( $= 86/4 = 21.5$ ) being associated with the solvent part of the Formula unit. As a  $\text{CH}_3\text{CN}$  molecule has 22 electrons, this then is consistent with the one  $\text{CH}_3\text{CN}$  (22 electrons) molecule in **1**.

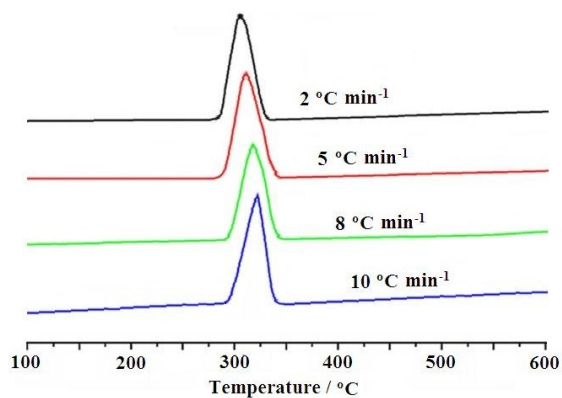

Figure S4 DSC curves of **2** under different heating rates

## 1. Oxygen bomb calorimetry

The constant-volume combustion energies of **1** and **2** were investigated by a precise rotating-oxygen bomb calorimeter (RBC-type II).<sup>1</sup> Approximately 10 mg of the samples were pressed with a well-defined amount of benzoic acid (Calcd. 30 mg) to form a tablet to ensure better combustion. The recorded data are the average of six single measurements. The calorimeter was calibrated by the combustion of certified benzoic acid (Standard Reference Material, 39i, NIST) in an oxygen atmosphere at a pressure of 30.5 bar. The experimental values of the constant volume combustion energies ( $\Delta_c U$ ) for **1** and **2** were  $(-12553.83 \pm 7.15) \text{ J g}^{-1}$  and  $(-14038.42 \pm 4.74)$ , respectively. Then the enthalpies of combustion ( $\Delta_c H_m^\theta$ ) was calculated as  $(-7555.52 \pm 4.30) \text{ kJ mol}^{-1}$  for **1**  $(-9025.30 \pm 3.05) \text{ kJ mol}^{-1}$  for **2** on the basis of the formula  $\Delta_c H_m^\theta = \Delta_c U_m^\theta + \Delta n RT$ ,  $\Delta n = n_g(\text{products}) - n_g(\text{reactants})$ , ( $n_g$  is the total molar amount of gases in the products or reactants,  $R = 8.314 \text{ J mol}^{-1} \text{ K}^{-1}$ ,  $T = 298.15 \text{ K}$ ). Subsequently, according to combustion reaction equation (3,4), Hess's law in thermochemical equation (5,6) and the known enthalpies of formation of the combustion products<sup>2,3</sup>  $\text{CuO (s)}$ ,  $\Delta_c H_m^\theta (\text{CuO, s}) = (-156) \text{ kJ mol}^{-1}$ ,  $\text{Na}_2\text{O (s)}$ ,  $\Delta_c H_m^\theta (\text{Na}_2\text{O, s}) = (-416) \text{ kJ mol}^{-1}$ ,  $\text{CO}_2 (\text{g})$ ,  $\Delta_c H_m^\theta (\text{CO}_2, \text{g}) = (-393) \text{ kJ mol}^{-1}$ ,  $\text{H}_2\text{O (l)}$ ,  $\Delta_c H_m^\theta (\text{H}_2\text{O, l}) = (-242) \text{ kJ mol}^{-1}$ , the standard enthalpies of formation for **1** ( $\Delta_f H_m^\theta$ ) and **2** ( $\Delta_f H_m^\theta$ ) are obtained as  $(3147.63 \pm 4.30) \text{ kJ mol}^{-1}$  and  $(3396.26 \pm 3.05) \text{ kJ mol}^{-1}$ , respectively, evidencing that N-N and N=N bonds in structure make a decisive contribution to the enthalpy of formation of **1** and **2**.

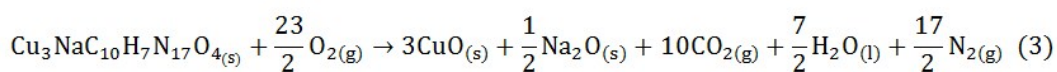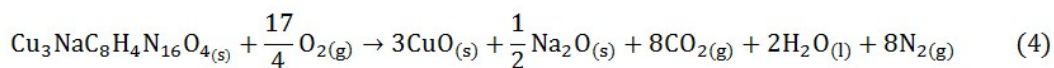

$$\begin{aligned} \Delta_f H_m^\theta (\text{s}) = & 3\Delta_f H_m^\theta (\text{CuO, s}) + \frac{1}{2} \Delta_f H_m^\theta (\text{Na}_2\text{O, s}) + 10\Delta_f H_m^\theta (\text{CO}_2, \text{g}) + \frac{7}{2} \Delta_f H_m^\theta (\text{H}_2\text{O, l}) \\ & - \Delta_c H_m^\theta (\text{1, s}) \end{aligned} \quad (5)$$

$$\begin{aligned} \Delta_f H_m^\theta (\text{s}) = & 3\Delta_f H_m^\theta (\text{CuO, s}) + \frac{1}{2} \Delta_f H_m^\theta (\text{Na}_2\text{O, s}) + 8\Delta_f H_m^\theta (\text{CO}_2, \text{g}) + 2\Delta_f H_m^\theta (\text{H}_2\text{O, l}) \\ & - \Delta_c H_m^\theta (\text{2, s}) \end{aligned} \quad (6)$$

## 2. The detonation properties of compounds 1 and 2

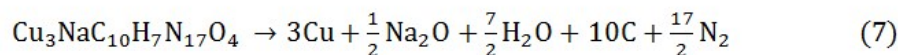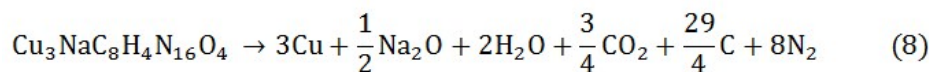

$$D = 1.01\Phi^{1/2}(1 + 1.30\rho) \quad (9)$$

$$P = 1.558\Phi\rho^2 \quad (10)$$

$$\Phi = 31.68N(MQ)^{1/2} \quad (11)$$

$$Q = \frac{-[\Delta H_f(\text{detonation products}) - \Delta H_f(\text{explosive})]}{\text{formula weight of explosive}} \quad (12)$$

Where  $D$  represents detonation velocity ( $\text{km s}^{-1}$ ),  $P$  is detonation pressure (GPa),  $\rho$  is the density of explosive ( $\text{g cm}^{-3}$ ),  $N$  is the moles of detonation gases per gram of explosive ( $\text{mol g}^{-1}$ ),  $M$  is the average molecular weight of these gases ( $\text{g mol}^{-1}$ ),  $Q$  is the heat of detonation ( $\text{kcal g}^{-1}$ ) and  $\Phi$  is a characteristic parameter of an explosive. Additionally, to further verify the calculated results, the commercial program EXPLO5 v6.0116<sup>4</sup> was employed to evaluate the detonation properties of compounds 1 and 2, which further demonstrated the accuracy of the new method.

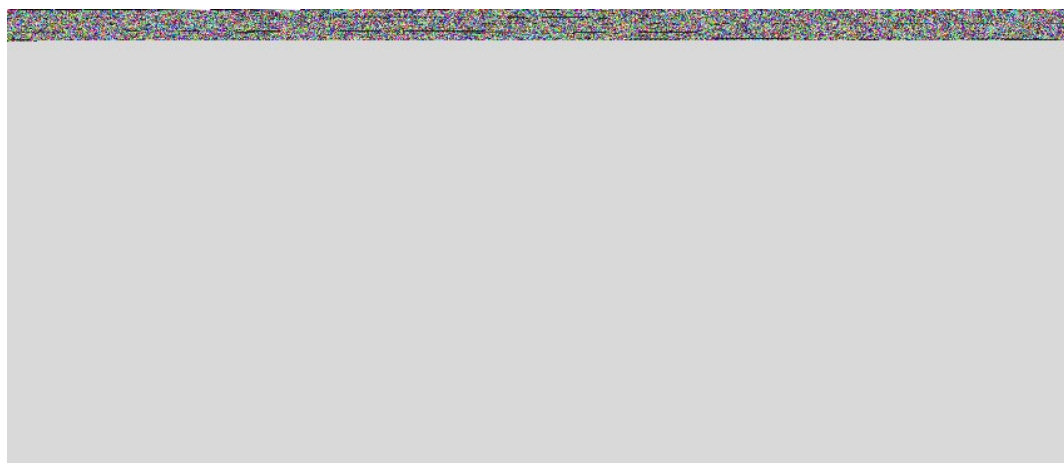

Table S3 The physicochemical properties of some energetic materials

| Explosive           | $\rho^a$<br>( $\text{g cm}^{-3}$ ) | $N^b$<br>(%) | $\Omega^c$<br>(%) | $T_{\text{dec}}^d$<br>( $^{\circ}\text{C}$ ) | $Q^e$<br>( $\text{kcal g}^{-1}$ ) | $D^f$<br>( $\text{km s}^{-1}$ ) | $P^g$<br>(GPa) |
|---------------------|------------------------------------|--------------|-------------------|----------------------------------------------|-----------------------------------|---------------------------------|----------------|
| ATRZ-1 <sup>5</sup> | 1.680                              | 53.35        | -58.83            | 243                                          | 3.618                             | 9.160                           | 35.68          |
| ATRZ-2 <sup>5</sup> | 2.160                              | 43.76        | -49.99            | 257                                          | 1.381                             | 7.773                           | 29.70          |
| TNT <sup>6</sup>    | 1.654                              | 18.50        | -74.00            | 244                                          | 1.22                              | 7.178                           | 20.50          |

|                                       |       |       |        |     |        |       |       |
|---------------------------------------|-------|-------|--------|-----|--------|-------|-------|
| RDX <sup>6</sup>                      | 1.806 | 37.80 | −21.60 | 210 | 1.44   | 8.600 | 33.92 |
| HMX <sup>7</sup>                      | 1.950 | 37.80 | −21.60 | 287 | 1.320  | 8.900 | 38.39 |
| CHP <sup>8a</sup>                     | 1.948 | 14.71 | −11.48 | 194 | 1.25   | 8.225 | 31.73 |
| NHP <sup>8a</sup>                     | 1.983 | 33.49 | −11.48 | 220 | 1.37   | 9.184 | 39.69 |
| CHHP <sup>8b</sup>                    | 2.000 | 23.58 | −13.05 | 231 | 0.75   | 6.205 | 17.96 |
| ZnHHP <sup>8b</sup>                   | 2.117 | 23.61 | −49.99 | 293 | 0.7    | 7.016 | 23.58 |
| [Cu(Htztr)] <sub>n</sub> <sup>9</sup> | 2.435 | 49.08 | −56.09 | 355 | 3.9582 | 10.40 | 56.48 |

[a] Density from X-ray diffraction. [b] Nitrogen content. [c] Oxygen balance. [d] Decomposition temperature. [e] The heat of detonation. [f] Detonation velocity. [g] Detonation pressure. ATRZ = 4,4'-azo-1,2,4-triazole; HMX = octogen; RDX = cyclotrimethylenetrinitramine; TNT = trinitrotoluene; CHP = cobalt hydrazine perchlorate; NHP = nickel hydrazine perchlorate; CHHP = cobalt hydrazine hydrazinecarboxylate perchlorate; ZnHHP = zinc hydrazine hydrazinecarboxylate perchlorate; H<sub>2</sub>tztr = 3-(1*H*-tetrazol-5-yl)-1*H*-triazole.

### 3. References

- [1]. X.W. Yang, S.P. Chen, S.L. Gao, H. Li, Q.Z. Shi, Construction of a rotating-bomb combustion calorimeter and measurement of thermal effects, *Instrum. Sci. Technol.* 30 (2002) 311–321.
- [2]. Y. Wang, J.C. Zhang, H. Su, S.H. Li, S.W. Zhang, S.P. Pang, A simple method for the prediction of the detonation performances of metal-containing explosives, *J. Phys. Chem. A* 118 (2014) 4575–4581.
- [3]. A. Bondi, van der Waals volumes and radii, *J. Phys. Chem.* 68 (1964) 441–451.
- [4]. M. Sućeska, Brodarski Institute, Zagreb, Croatia, EXPLO5 6.01, (2013).
- [5]. S.H. Li, Y. Wang, C. Qi, X.X. Zhao, J.C. Zhang, S.W. Zhang, S.P. Pang, 3D energetic metal–organic frameworks: synthesis and properties of high energy materials, *Angew. Chem. Int. Ed.* 52 (2013) 14031–14035.
- [6]. J. Köhler, R. Meyer, *Explosivstoffe*, 9th edn, Wiley-VCH, Weinheim, (1998).
- [7]. O.S. Bushuyev, P. Brown, A. Maiti, R.H. Gee, G.R. Peterson, B.L. Weeks, L.J. Hope-Weeks, Ionic polymers as a new structural motif for high-energy-density materials, *J. Am. Chem. Soc.* 134 (2012) 1422–1425.
- [8]. O.S. Bushuyev, G.R. Peterson, P. Brown, A. Maiti, R.H. Gee, B.L. Weeks, L.J. Hope-Weeks, Metal–organic frameworks (MOFs) as safer, structurally reinforced energetics, *Chem. Eur. J.* 19 (2013) 1706–1714.
- [9]. X.N. Qu, L.J. Zhai, B.Z. Wang, Q. Wei, G. Xie, S.P. Chen, S.L. Gao, Copper-based energetic MOFs with 3-nitro-1*H*-1,2,4-triazole: solvent-dependent syntheses, structures and energetic performances, *Dalton Trans.* 45 (2016) 17304–17311.
